# Supplementary material for: Individual and Combined Effects of a Direct-Fed Microbial and Calcium Butyrate on Growth Performance, Intestinal Histology and Gut Microbiota of Broiler Chickens
Source: MDPI journal article supplement (doi:10.3390/poultry2010008), 2023-02-22
Supplement: s1 [file s1]

Archive with 1 entries (1 files):
- poultry-2133114-supplemenraty file update.pdf
